# Supplementary material for: Chitosan–lignin carbon framework-encapsulated Cu catalyst facilitates base-free hydrogen evolution from methanol/water
Source: Royal Society of Chemistry journal article supplement (doi:10.1039/d1cy01698a), 2022-01-01
Supplement: d1cy01698a1.pdf [file d1cy01698a1.pdf]

# Chitosan-Lignin Carbon Framework Encapsulated Cu Catalyst Facilitates Base-free Hydrogen Evolution from Methanol/Water

Yunhong Pi,<sup>‡\*</sup> Xiuting Wu,<sup>‡</sup> Zefeng Zheng, Liang Ma, Tiejun Wang\*

*1 School of Chemical Engineering and Light Industry, Guangdong University of Technology, Guangzhou 510006, P. R. China.*

*2 Guangzhou Key Laboratory of Clean Transportation Energy and Chemistry, Guangdong University of Technology, Guangzhou 510006, P. R. China.*

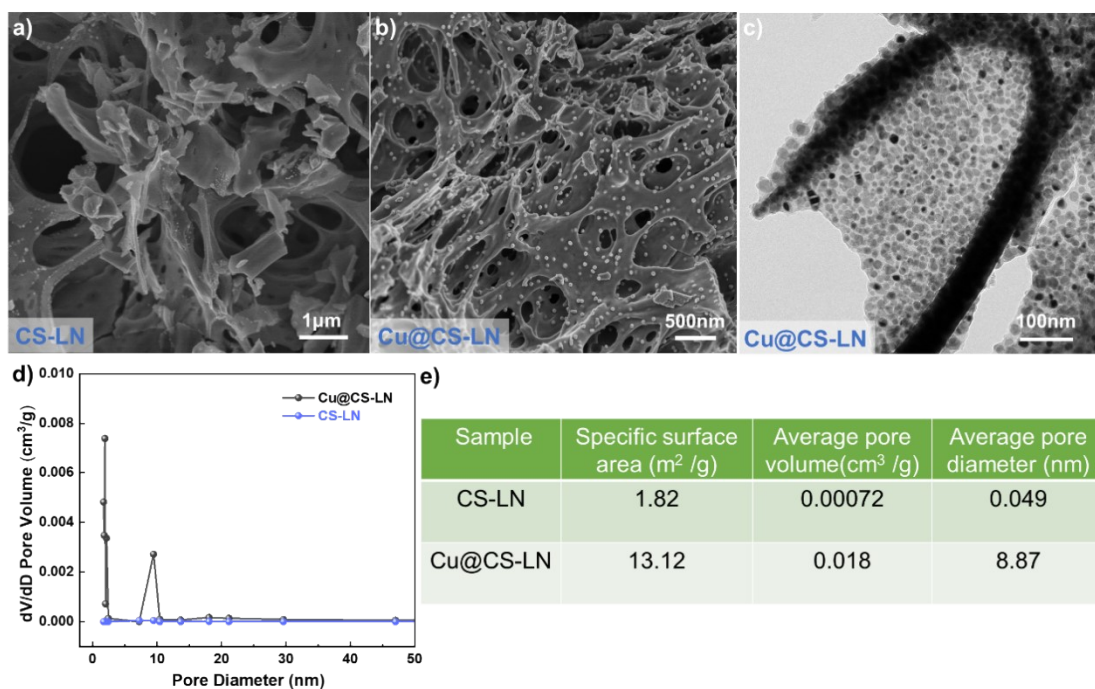

**Fig. S1** SEM image of CS-LN composite(a) and Cu@CS-LN(b); (c) TEM of Cu@CS-LN; (d) Pore size distribution of CS-LN and Cu@CS-LN; (e) the specific surface area, average pore volume, and average pore size of the CS-LN support and Cu@CS-LN.

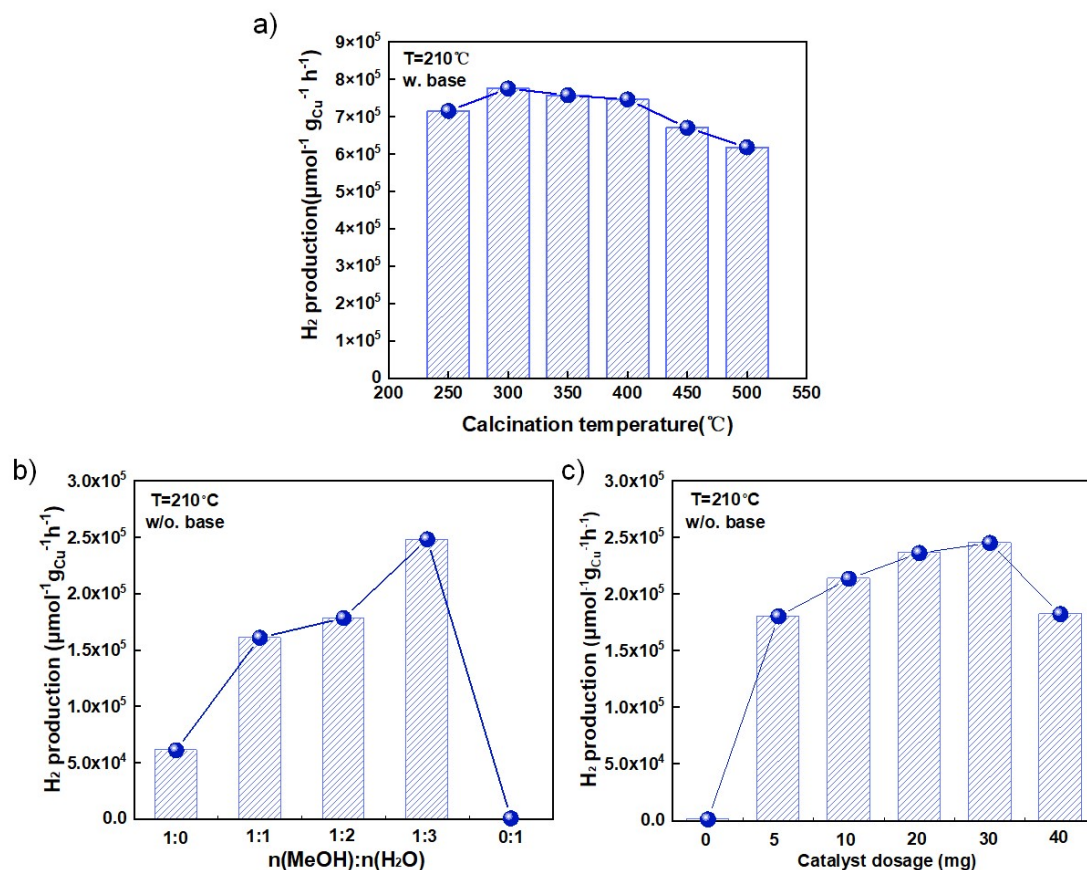

**Fig. S2** The hydrogen production rate of (a) various calcination temperatures (250-500 °C) with 5 wt% NaOH; (b) various molar ratio of MeOH to H<sub>2</sub>O; (c) various dosage of Cu@CS-LN catalyst. Reaction conditions: 210 °C, 2 MPa, N<sub>2</sub>.

**Table S1.** The generation of H<sub>2</sub> via aqueous phase methanol reforming over M@CS-LN (M=Ni, Fe, Co) catalysts <sup>a</sup>

| Entry | Catalyst | Temp (°C) | n <sub>CH<sub>3</sub>OH</sub> :n <sub>H<sub>2</sub>O</sub> | μmol <sub>H<sub>2</sub></sub> g <sub>Cu</sub> <sup>-1</sup> h <sup>-1b</sup> | Sel (CO)% |
|-------|----------|-----------|------------------------------------------------------------|------------------------------------------------------------------------------|-----------|
| 1     | Cu@CS-LN | 210       | 1 : 3                                                      | 2.5 × 10 <sup>5</sup>                                                        | 0.22      |
| 2     | Ni@CS-LN | 210       | 1 : 3                                                      | 3.9 × 10 <sup>4</sup>                                                        | 6.6       |
| 3     | Fe@CS-LN | 210       | 1 : 3                                                      | 6.4 × 10 <sup>4</sup>                                                        | 3.9       |
| 4     | Co@CS-LN | 210       | 1 : 3                                                      | 7.4 × 10 <sup>4</sup>                                                        | 2.1       |

<sup>a</sup>Reaction conditions: n(MeOH)/n(H<sub>2</sub>O) = 1:3, 10 mL of total volume of liquid, 30 mg of activated catalysts, no base, 2 MPa of N<sub>2</sub>. <sup>b</sup>Catalytic performance is calculated as the hydrogen production per gram of Cu-catalyst per hour. The unit is μmol<sub>H<sub>2</sub></sub> g<sub>Cu</sub><sup>-1</sup> h<sup>-1</sup>.

**Table S2.** Catalytic hydrogen evolution activity of aqueous MeOH reforming<sup>a</sup>

\*Corresponding author. E-mail : piyunhong@163.com (Y. Pi) and tjwang@gdut.edu.cn (T. Wang)

| Entry          | Catalyst | Temp (°C) | $\mu\text{mol}_{\text{H}_2} \text{g}_{\text{Cu}}^{-1} \text{h}^{-1b}$ | Sel (CO)% |
|----------------|----------|-----------|-----------------------------------------------------------------------|-----------|
| 1              | Cu@CS-LN | 210       | $2.5 \times 10^5$                                                     | 0.22      |
| 2              | CS-LN    | 210       | 1082                                                                  | 6.2       |
| 3              | --       | 210       | --                                                                    | --        |
| 4              | Cu/LN    | 210       | 1131                                                                  | 3.9       |
| 5              | Cu@CS    | 210       | $1.1 \times 10^5$                                                     | 0.21      |
| 6 <sup>c</sup> | Cu@CS-LN | 210       | 898                                                                   | 1.1       |
| 7 <sup>d</sup> | Cu@CS-LN | 210       | $1.8 \times 10^5$                                                     | 0.002     |

<sup>a</sup>Reaction conditions:  $n(\text{MeOH})/n(\text{H}_2\text{O}) = 1:3$ , 10 mL of total volume of liquid, 30 mg of activated catalysts, no base, 2 MPa of  $\text{N}_2$ . <sup>b</sup>Catalytic performance is calculated as the hydrogen production per gram of Cu-catalyst per hour. The unit is  $\mu\text{mol}_{\text{H}_2} \text{g}_{\text{Cu}}^{-1} \text{h}^{-1}$ . <sup>c</sup> Reaction conducted in the air atmosphere. <sup>d</sup> Cu@CS-LN precursor was calcined in  $\text{N}_2$  at 500 °C for 2h.

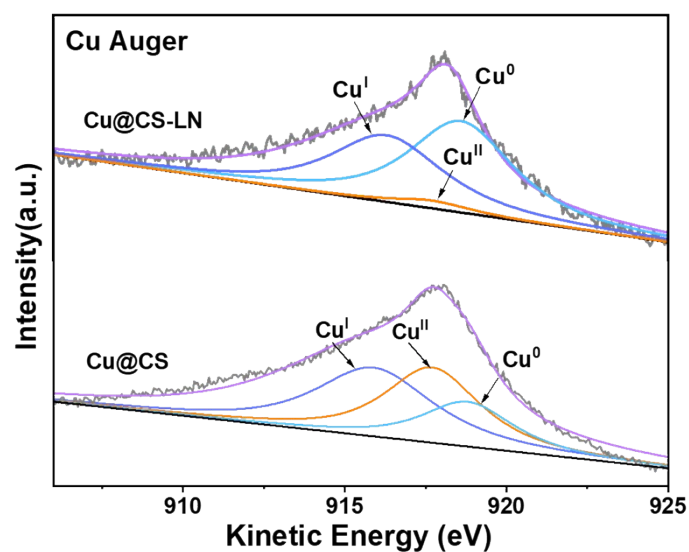

Fig. S3 Cu  $L_{3M_{45}M_{45}}$  Auger spectra of Cu@CS-LN and Cu@CS.

**Table S3.** The kinetic energy of Cu LMM peak in XPS and surface Cu<sup>I</sup>/Cu<sup>0</sup> ratio of the sets of Cu-containing catalysts. %Cu<sup>II</sup> is the percentage of Cu<sup>II</sup>

| Catalyst        | Kinetic energy of Cu LMM (eV) |                 |                  | Surface Cu <sup>I</sup> /Cu <sup>0</sup> | %Cu <sup>II</sup> |
|-----------------|-------------------------------|-----------------|------------------|------------------------------------------|-------------------|
|                 | Cu <sup>0</sup>               | Cu <sup>I</sup> | Cu <sup>II</sup> | atomic ratio(%)                          | By fitting        |
| Cu@CS           | 918.6                         | 916.7           | 917.7            | 196.7                                    | 37.0              |
| Cu@CS-LN        | 918.6                         | 916.4           | 917.7            | 78.3                                     | 3.4               |
| Cu@CS-LN (A.R.) | 918.5                         | 916.5           | 917.7            | 68.4                                     | 1.0               |

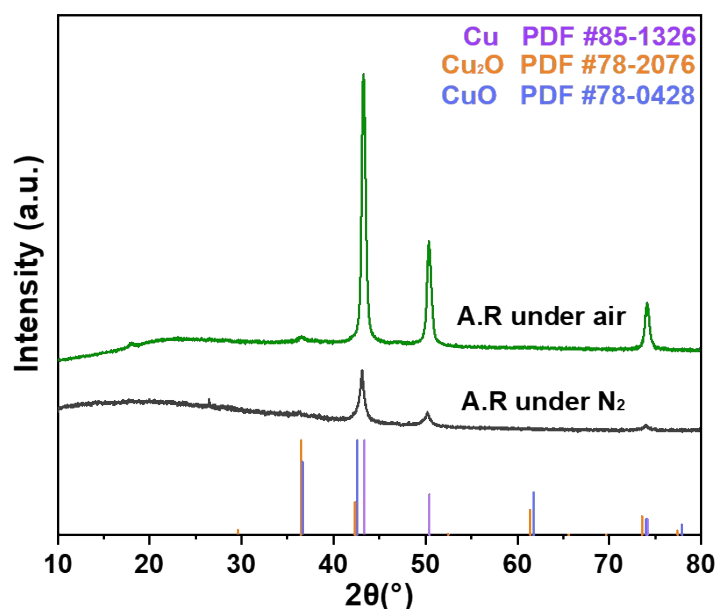

**Fig. S4** The XRD patterns of Cu@CS-LN catalysts after reaction (A.R) under N<sub>2</sub>/air atmosphere. Reaction conditions: n(MeOH)/n(H<sub>2</sub>O) = 1:3, 10 mL of total volume of liquid, 30 mg of activated Cu@CS-LN catalysts, no base, 210 °C, 2 MPa of N<sub>2</sub>/air.

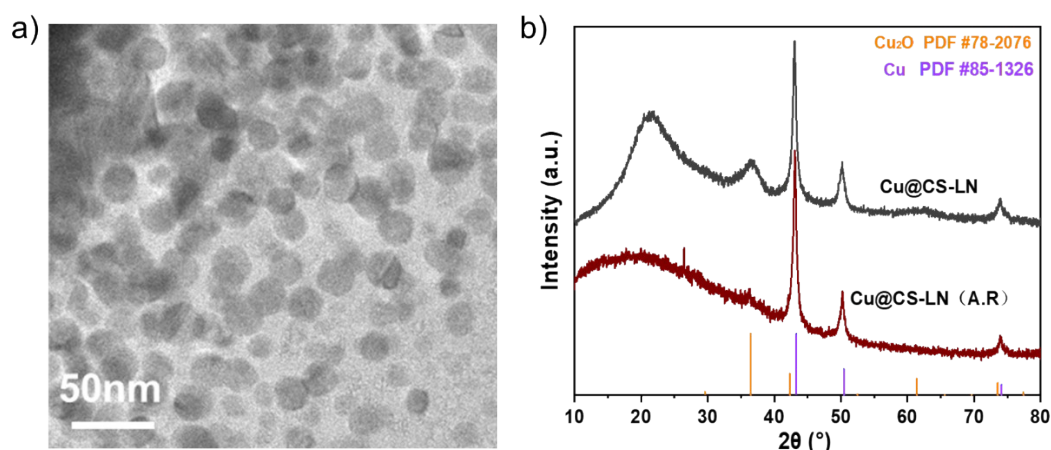

**Fig. S5** (a) The TEM image after reactions; (b) XRD patterns before and after reaction over Cu@CS-LN catalyst in the hydrogen production of aqueous MeOH reforming under optimal reaction.

**Table S4.** Correlation between the reactivity of APRM and the contact angle of catalysts

| Entry | Catalyst | Contact angle(°) | $\mu\text{mol}_{\text{H}_2} \text{g}_{\text{Cu}}^{-1} \text{h}^{-1a}$ |
|-------|----------|------------------|-----------------------------------------------------------------------|
| 1     | Cu@CS-LN | 55.3±2.4         | 2.5x10 <sup>5</sup>                                                   |
| 2     | CS-LN    | 68.2±1.2         | 1082                                                                  |
| 3     | CS       | 117.1±4.2        | 272                                                                   |

Reaction conditions:  $n(\text{MeOH})/n(\text{H}_2\text{O}) = 1:3$ , 10 mL of total volume of liquid, 30 mg of activated catalysts, no base, 210 °C, 2 MPa of N<sub>2</sub>. <sup>a</sup>Catalytic performance is calculated as the hydrogen production per gram of Cu-catalyst per hour. The unit is  $\mu\text{mol}_{\text{H}_2} \text{g}_{\text{Cu}}^{-1} \text{h}^{-1}$ . <sup>b</sup>The hydrogen production rate decreases remarkably with rise of contact angle, verifying that improving catalyst wettability could promote activity for APR of methanol.

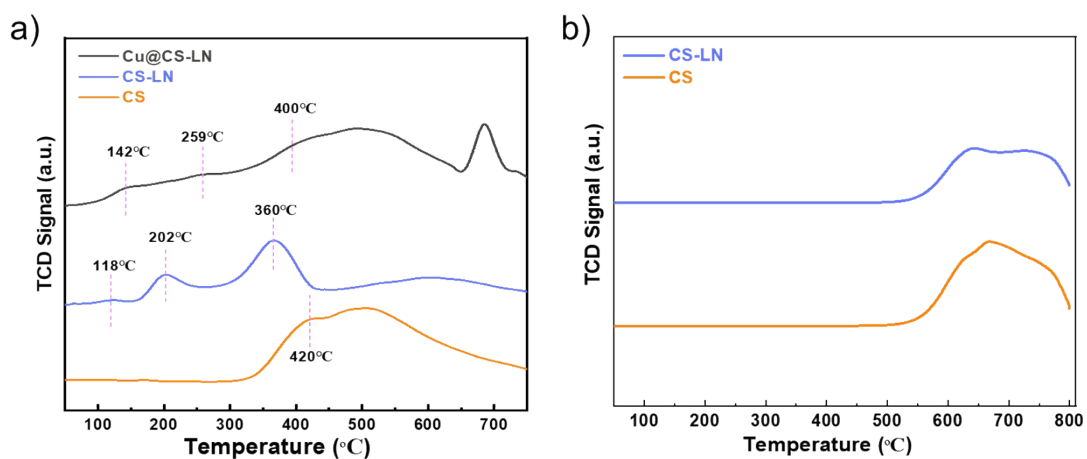

**Fig. S6** Temperature-programmed desorption (TPD) experiment (a) with methanol over CS, CS-LN, and Cu@CS-LN (b) without methanol over CS and CS-LN.

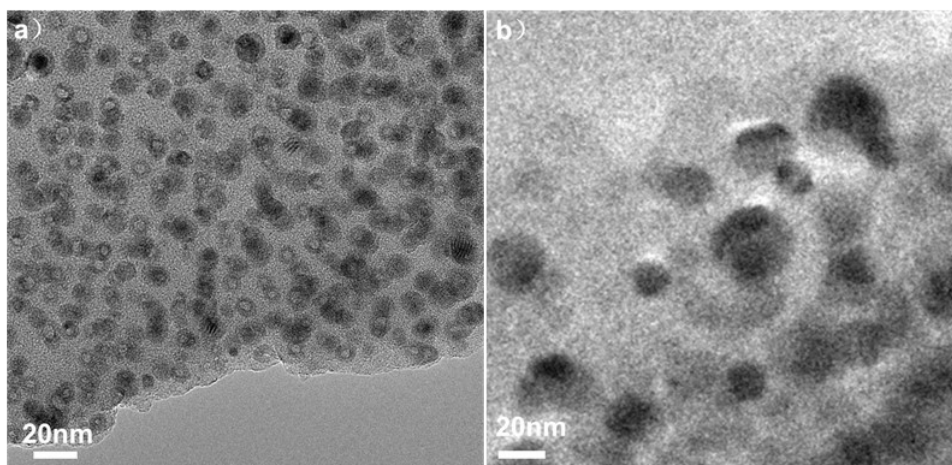

**Fig. S7** The TEM image of Cu/CS-LN (a) before reaction (with particle size of  $11.2 \pm 1.7$  nm) and (b) after reaction (with particle size of  $20.6 \pm 1.2$  nm).

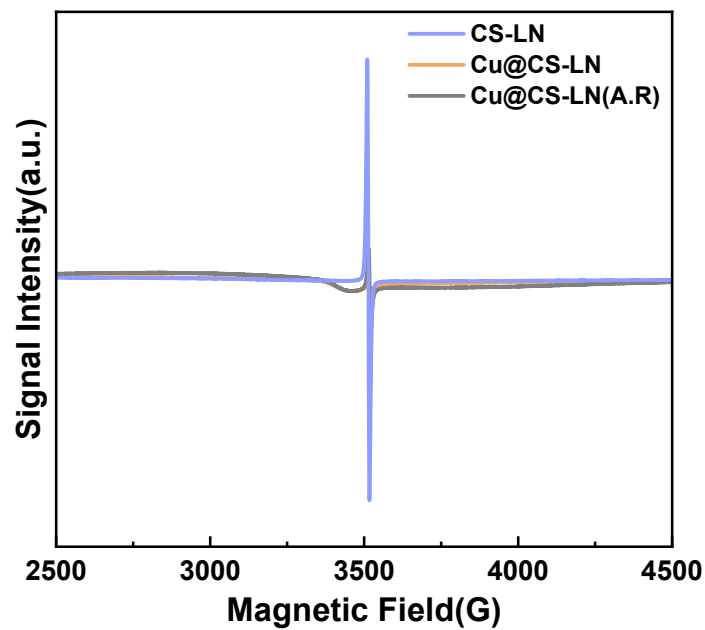

**Fig S8.** EPR spectra of CS-LN and Cu@CS-LN before and after reaction. The spectra of Cu@CS-LN almost overlapped with that of pure carbon framework CS-LN, ruling out the existence of Cu<sup>II</sup> in the copper species.
